## Correlates and prognostic significance of nuisance bleeding after acute myocardial infarction. The FAST-MI programme

N. Danchin<sup>1</sup>, E. Puymirat<sup>1</sup>, K. Isaaz<sup>2</sup>, P. Druelles<sup>3</sup>, O. Dibon<sup>4</sup>, T. Lefevre<sup>5</sup>, F. Bernasconi<sup>6</sup>, E. Drouet<sup>7</sup>, J. Ferrieres<sup>8</sup>, F. Schiele<sup>9</sup>, T. Simon<sup>7</sup>

<sup>1</sup>AP-HP - European Hospital Georges Pompidou, Paris, France; <sup>2</sup>CHU Saint Etienne Hopital Nord, Saint-Etienne, France; <sup>3</sup>Polyclinic Saint Laurent of Rennes, Rennes, France; <sup>4</sup>Centre Hospitalier, Orleans, France; <sup>5</sup>Cardiovascular Institute Paris-Sud (ICPS), Massy, France; <sup>6</sup>Hospital of Antibes Juan Les Pins, Antibes, France; <sup>7</sup>AP-HP - Hospital Saint Antoine, Paris, France; <sup>8</sup>Toulouse Rangueil University Hospital (CHU), Toulouse, France; <sup>9</sup>Regional University Hospital Jean Minjot, Besancon, France

On behalf of FAST-MI investigators

**Funding Acknowledgement:** Amgen, AstraZeneca, Bayer, Daiichi-Sankyo, Eli-Lilly, GSK, MSD, Novartis, Pfizer, Sanofi, Servier

**Background:** Following acute myocardial infarction (AMI), most patients receive potent antithrombotic medications, which may promote nuisance bleedings (ecchymoses, minor nose or dental bleeds etc.). Little information is available on the factors related to nuisance bleedings, nor on their prognostic significance in post-AMI patients.

**Aims and methods:** A health status questionnaire was sent to all patients participating in the nationwide French FAST-MI cohorts (2010 and 2015) one year after the acute episode, with a specific question on the presence of nuisance bleedings. Overall, 3968 patients answered the question on the presence nuisance bleedings. In the 2010 cohorts, we also analysed whether the presence of nuisance bleedings at one year was an independent correlate of 5-year mortality.

**Results:** 54% of the patients reported the presence of nuisance bleedings (59% in 2010 and 51% in 2015). In univariate analyses, nuisance bleedings were more frequently found in younger patients, women, patients with STEMI, current smokers, patients treated with PCI, those receiving newer P2Y12 inhibitors or ACE-inhibitors but less frequent in patients with dia-

betes, hypertension, or those receiving ARBs or direct oral anticoagulants. Using logistic regression analysis, however, the only independent correlates of nuisance bleedings were: female gender (OR 1.45, 1.25–1.68), age  $\leq 60$  years (OR 1.22, 1.06–1.41), VKAs (OR 1.72, 1.28–2.31), clopidogrel (OR 1.62, 1.29–2.03), prasugrel (OR 3.16, 2.43–4.09), ticagrelor (OR 2.61, 2.04–3.35) at discharge, diabetes (OR 0.74, 0.63–0.88) and year 2015 vs 2010 (OR 0.62, 0.53–0.73).

In the 2010 cohort, the presence of nuisance bleeding at one year was not a predictor of mortality at 5 years (90% survival in both patients with or without nuisance bleedings; adjusted HR 0.96, 95% CI 0.69–1.33) (Figure).

**Conclusion:** Nuisance bleedings one year after AMI are extremely frequent. They are more common in women, younger patients, in patients receiving P2Y12 inhibitors, especially newer P2Y12-i, and in those receiving VKAs; in contrast, diabetic patients report less nuisance bleedings. The presence of nuisance bleeding at one year does not appear to impact 5-year mortality.

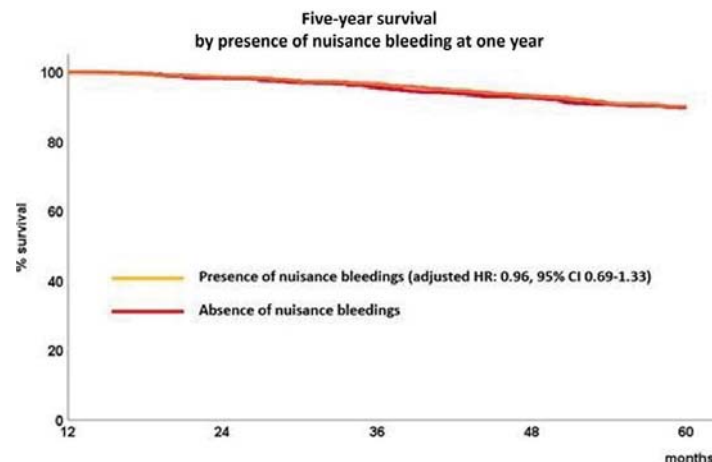

Figure 1. 5-yr survival by nuisance bleed
